# Supplementary material for: Nucleosome positioning and nucleosome stacking: two faces of the same coin
Source: Royal Society of Chemistry journal article supplement (doi:10.1039/c2mb05407h), 2012-01-23
Supplement: c2mb05407h.pdf [file c2mb05407h.pdf]

## Nucleosome Positioning and Nucleosome Stacking: Two Faces of The Same Coin.

Julien Riposo, Julien Mozziconacci

SUPPLEMENTARY MATERIAL

**Table 1A: Comparison of the Kurtosis and Skewness obtained using the Statistical positioning model to the experimental data**

Kurtosis is a measure of the distribution "peakedness" ( $= \frac{\mu_4}{\sigma^4}$ , where  $\mu_n$  is the nth moment, and  $\sigma$  the standard deviation), whereas skewness is a measure of the curve asymmetry ( $= \frac{\mu_3}{\sigma^3}$ ).

| Nucleosome | Experimental kurtosis | Experimental skewness | Model kurtosis | Model skewness |
|------------|-----------------------|-----------------------|----------------|----------------|
| +2         | 2.793                 | 0.167                 | 2.355          | 0.651          |
| +3         | 2.383                 | 0.068                 | 2.034          | 0.389          |
| +4         | 2.081                 | -0.0914               | 1.863          | 0.089          |
| +5         | 2.090                 | 0.0180                | 1.879          | -0.136         |
| +6         | 1.940                 | 0.107                 | 1.847          | -0.183         |
| +7         | 1.854                 | 0.0682                | 1.986          | 0.858          |
| +8         | 1.809                 | 0.0544                | 1.863          | -0.775         |
| +9         | 1.803                 | 0,00230               | 2.767          | -1.073         |
| +10        | 1.791                 | -0.0268               | 5.866          | -1.519         |
| +11        | 1.804                 | -0.0308               | 1.782          | -0.011         |
| +12        | 1.809                 | -0.0197               | 6.068          | 1.491          |

**Table 1B: Comparison of the Kurtosis and Skewness obtained using the Gaussian mixture model to the experimental data**

Kurtosis is a measure of the distribution "peakedness" ( $= \frac{\mu_4}{\sigma^4}$ , where  $\mu_n$  is the nth moment, and  $\sigma$  the standard deviation), whereas skewness is a measure of the curve asymmetry ( $= \frac{\mu_3}{\sigma^3}$ ).

| Nucleosome | Experimental kurtosis | Experimental skewness | Model kurtosis | Model skewness |
|------------|-----------------------|-----------------------|----------------|----------------|
| +2         | 2.793                 | 0.167                 | 2.860          | 0.239          |
| +3         | 2.383                 | 0.068                 | 2.312          | 0.125          |
| +4         | 2.081                 | -0.0914               | 2.012          | -0.0274        |
| +5         | 2.090                 | 0.0180                | 2.080          | 0.0088         |
| +6         | 1.940                 | 0.107                 | 1.964          | 0.0763         |
| +7         | 1.854                 | 0.0682                | 1.899          | 0.0603         |
| +8         | 1.809                 | 0.0544                | 1.872          | 0.0855         |
| +9         | 1.803                 | 0,00230               | 1.854          | -0.0168        |
| +10        | 1.791                 | -0.0268               | 1.820          | -0.0392        |
| +11        | 1.804                 | -0.0308               | 1.799          | 0,00821        |
| +12        | 1.809                 | -0.0197               | 1.792          | -0.00755       |

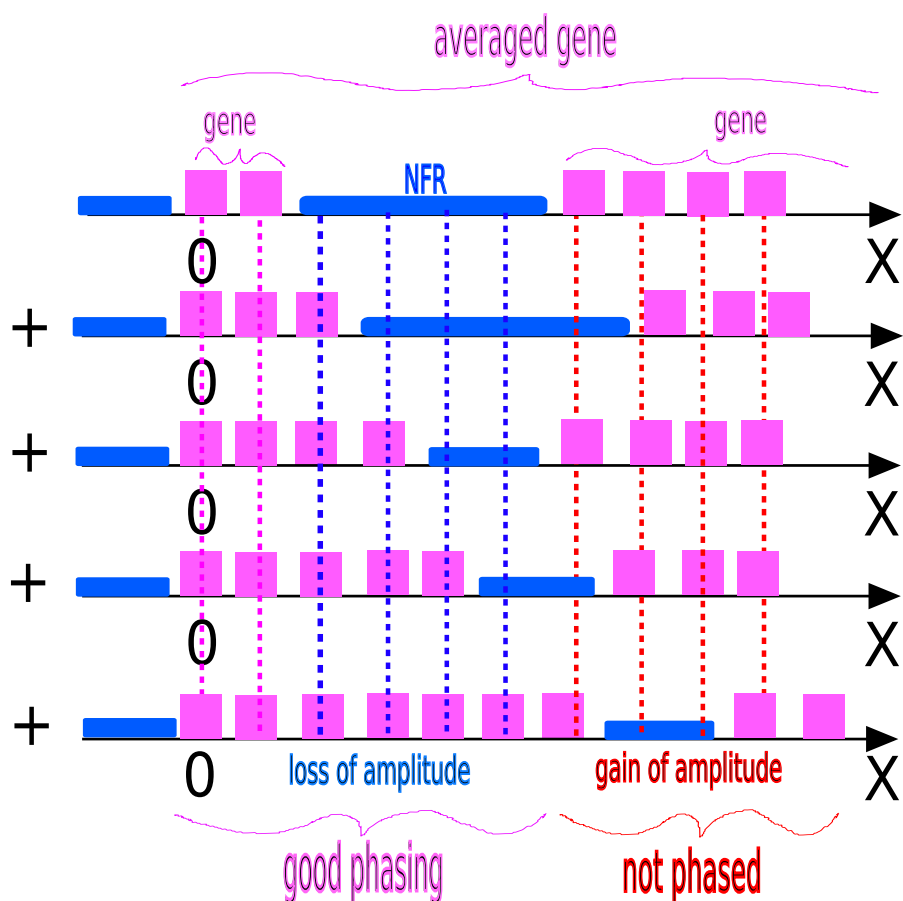

Figure S 1: The loss of amplitude  $A_i$  is due to the presence of NFRs at the end of genes. The variances  $\{\sigma_i^2\}$  increase after the +6, because the nucleosome phasing decreases while  $i$  increases, as shown.

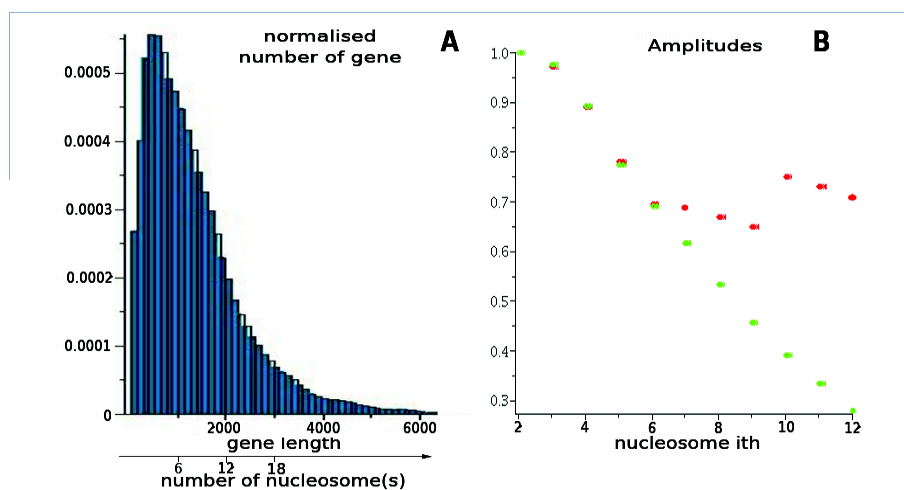

Figure S 2: The loss of amplitude  $A_i$  can be quantitatively explained by the gene length distribution found in *Saccharomyces Cerevisae*. A: Gene length distribution (in bp and in nucleosomes). B: In green, relative amount of genes having a length of at least  $i$  nucleosomes. In red: Amplitudes of the nucleosomal density peaks as found in our gaussian mixture model.

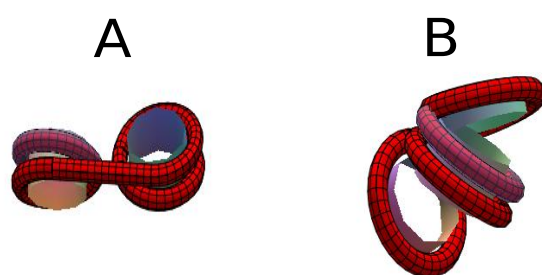

Figure S 3: The two plausible structures for the 167 bp NRL chromatin fiber. Two nucleosomes are represented.
